# Supplementary material for: Decreasing pH Results in a Reduction of Anthocyanin Coprecipitation during Cold Stabilization of Purple Grape Juice
Source: MDPI journal article supplement (doi:10.3390/molecules20010556), 2015-01-05
Supplement: s1 [file s1]

## Supplementary Materials

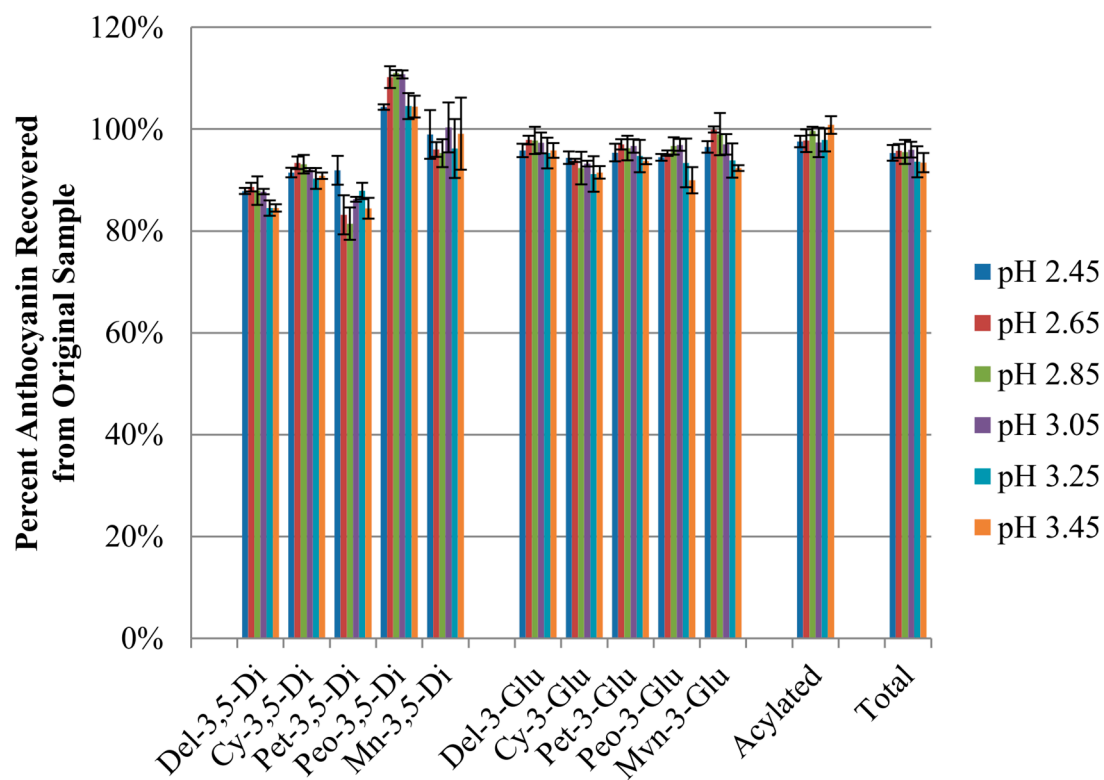

**Figure S1.** Mass balance of anthocyanin species. The recovery was calculated as the ratio of the sum of anthocyanins in KHT crystals and in the cold-stabilized juice to the initial mass of anthocyanin in the juice prior to cold stabilization.
